# Supplementary material for: Effects of Daily Zinc Alone or in Combination with Other Nutrient Supplements on the Risk of Malaria Parasitaemia: A Systematic Review and Meta-Analysis of Randomised Controlled Trials
Source: MDPI journal article supplement (doi:10.3390/nu15132855), 2023-06-23
Supplement: s1 [file s1]

# Effects of Daily Zinc Alone or in Combination with Other Nutrient Supplements on the Risk of Malaria Parasitaemia: A Systematic Review and Meta-Analysis of Randomised Controlled Trials

Manas Kotepui<sup>1†\*</sup>, Polrat Wilairatana<sup>2†\*</sup>, Wanida Mala<sup>1</sup>, Kwuntida Uthaisar Kotepui<sup>1</sup>, Frederick Ramirez Masangkay<sup>3</sup>, Kinley Wangdi<sup>4</sup>

<sup>1</sup> Medical Technology, School of Allied Health Sciences, Walailak University, Tha Sala, Nakhon Si Thammarat, Thailand

<sup>2</sup> Department of Clinical Tropical Medicine, Faculty of Tropical Medicine, Mahidol University, Bangkok, Thailand

<sup>3</sup> Department of Medical Technology, University of Santo Tomas, Manila, Philippines

<sup>4</sup> Department of Global Health, National Centre for Epidemiology and Population Health, College of Health and Medicine, Australian National University, Canberra, Acton, ACT 2601, Australia

## \*Corresponding author

† These authors contributed equally to this work

Manas Kotepui [manas.ko@wu.ac.th](mailto:manas.ko@wu.ac.th), Tel+ :.66954392469

Polrat Wilairatana: [polrat.wil@mahidol.ac.th](mailto:polrat.wil@mahidol.ac.th)

Wanida Mala: [wanida.ma@wu.ac.th](mailto:wanida.ma@wu.ac.th)

Kwuntida Uthaisar Kotepui: [kwuntida.ut@wu.ac.th](mailto:kwuntida.ut@wu.ac.th)

Frederick Ramirez Masangkay: [frederick\\_masangkay2002@yahoo.com](mailto:frederick_masangkay2002@yahoo.com)

Kinley Wangdi: [kinley.wangdi@anu.edu.au](mailto:kinley.wangdi@anu.edu.au)

**Table S1. Search terms****General keywords**

zinc AND (malaria OR plasmodium OR “Plasmodium Infection“ OR “Remittent Fever“ OR “Marsh Fever“ OR Paludism) AND (“Clinical Trials“ OR “Randomized Trials” OR “Randomized Controlled Trials” OR “Controlled Clinical Trials”)

PubMed 6 May 2023

| No. | Key concept     | Search terms                                                                                                                                                                                                                                                                                                                                                                                                                                                                                 | Results |
|-----|-----------------|----------------------------------------------------------------------------------------------------------------------------------------------------------------------------------------------------------------------------------------------------------------------------------------------------------------------------------------------------------------------------------------------------------------------------------------------------------------------------------------------|---------|
| 1.  | Zinc            | zinc[tw] OR zinc [Mesh]                                                                                                                                                                                                                                                                                                                                                                                                                                                                      | 178,232 |
| 2.  | Malaria         | malaria[tw] OR plasmodium[tw] OR “Infections, Plasmodium“[Mesh] OR “Infection, Plasmodium“[Mesh] OR “Plasmodium Infection“[Mesh] OR “Remittent Fever“[Mesh] OR “Fever, Remittent“[Mesh] “Marsh Fever“[Mesh] OR “Fever, Marsh“[Mesh] OR Paludism[Mesh]                                                                                                                                                                                                                                        | 74,058  |
| 3.  | Clinical trials | “Clinical Trials“[tw] OR “Randomized Trials” [tw] OR “Randomized Controlled Trials” [tw] OR “Controlled Clinical Trials” [tw] OR “Clinical Trials“[Mesh] OR “Randomized Controlled Trials”[Mesh]                                                                                                                                                                                                                                                                                             | 687,359 |
| 3.  | 1 AND 2 AND 3   | (zinc[tw] OR zinc [Mesh]) AND (malaria[tw] OR plasmodium[tw] OR “Infections, Plasmodium“[Mesh] OR “Infection, Plasmodium“[Mesh] OR “Plasmodium Infection“[Mesh] OR “Remittent Fever“[Mesh] OR “Fever, Remittent“[Mesh] “Marsh Fever“[Mesh] OR “Fever, Marsh“[Mesh] OR Paludism[Mesh]) AND (“Clinical Trials“[tw] OR “Randomized Trials” [tw] OR “Randomized Controlled Trials” [tw] OR “Controlled Clinical Trials” [tw] OR “Clinical Trials“[Mesh] OR “Randomized Controlled Trials”[Mesh]) | 17      |

Embase 6 May 2023

| No. | Key concept     | Search terms                                                                                                                                       | Results |
|-----|-----------------|----------------------------------------------------------------------------------------------------------------------------------------------------|---------|
| 1.  | Zinc            | zinc:ti,ab,kw,de OR zinc/exp                                                                                                                       | 294,567 |
| 2.  | Malaria         | malaria:ti,ab,kw,de OR plasmodium:ti,ab,kw,de OR ‘Remittent Fever’:ti,ab,kw,de OR ‘Marsh Fever’:ti,ab,kw,de OR Paludism:ti,ab,kw,de OR malaria/exp | 155,458 |
| 3.  | Clinical trials | “Clinical Trials“:ti,ab,kw,de OR “Randomized Trials”:ti,ab,kw,de OR “Randomized Controlled Trials”:ti,ab,kw,de OR “Controlled Clinical             | 845,731 |

|     |               |                                                                                                                                                                                                                                                                                                                                                                                                                         |    |
|-----|---------------|-------------------------------------------------------------------------------------------------------------------------------------------------------------------------------------------------------------------------------------------------------------------------------------------------------------------------------------------------------------------------------------------------------------------------|----|
|     |               | Trials”:ti,ab,kw,de OR “Clinical Trials“/exp OR “Randomized Controlled Trials”/exp                                                                                                                                                                                                                                                                                                                                      |    |
| 4.. | 1 AND 2 AND 3 | (zinc:ti,ab,kw,de OR zinc/exp) AND (malaria:ti,ab,kw,de OR plasmodium:ti,ab,kw,de OR ‘Remittent Fever’:ti,ab,kw,de OR ‘Marsh Fever’:ti,ab,kw,de OR Paludism:ti,ab,kw,de OR malaria/exp) AND (“Clinical Trials”:ti,ab,kw,de OR “Randomized Trials”:ti,ab,kw,de OR “Randomized Controlled Trials”:ti,ab,kw,de OR “Controlled Clinical Trials”:ti,ab,kw,de OR “Clinical Trials“/exp OR “Randomized Controlled Trials”/exp) | 54 |

Scopus 6 May 2023

| No. | Key concept     | Search terms                                                                                                                                                                                                                                                                            | Results   |
|-----|-----------------|-----------------------------------------------------------------------------------------------------------------------------------------------------------------------------------------------------------------------------------------------------------------------------------------|-----------|
| 1.  | Zinc            | TITLE-ABS-KEY ( zinc )                                                                                                                                                                                                                                                                  | 678,133   |
| 2.  | Malaria         | TITLE-ABS-KEY ( malaria OR plasmodium OR "plasmodium infection" OR "remittent fever" OR "marsh fever" OR paludism )                                                                                                                                                                     | 156,232   |
| 3.  | Clinical trials | TITLE-ABS-KEY ( "Clinical Trials" OR "Randomized Trials" OR "Randomized Controlled Trials" OR "Controlled Clinical Trials" )                                                                                                                                                            | 2,192,383 |
| 4.  | 1 AND 2 AND 3   | ( TITLE-ABS-KEY ( zinc ) ) AND ( TITLE-ABS-KEY ( malaria OR plasmodium OR "plasmodium infection" OR "remittent fever" OR "marsh fever" OR paludism ) ) AND TITLE-ABS-KEY ( "Clinical Trials" OR "Randomized Trials" OR "Randomized Controlled Trials" OR "Controlled Clinical Trials" ) | 169       |

MEDLINE 6 May 2023

| No. | Key concept                          | Search terms                                                                                                                                                                                                                  | Results |
|-----|--------------------------------------|-------------------------------------------------------------------------------------------------------------------------------------------------------------------------------------------------------------------------------|---------|
| 1.  | Zinc AND Malaria AND Clinical trials | zinc AND (malaria OR plasmodium OR “Plasmodium Infection“ OR “Remittent Fever“ OR “Marsh Fever“ OR Paludism) AND (“Clinical Trials“ OR “Randomized Trials” OR “Randomized Controlled Trials” OR “Controlled Clinical Trials”) | 28      |

Ovid 6 May 2023

| No. | Key concept                          | Search terms                                                                                                                                                                                                                                     | Results |
|-----|--------------------------------------|--------------------------------------------------------------------------------------------------------------------------------------------------------------------------------------------------------------------------------------------------|---------|
| 1.  | Zinc AND Malaria AND Clinical trials | zinc AND (malaria OR plasmodium OR “Plasmodium Infection“ OR “Remittent Fever“ OR “Marsh Fever“ OR Paludism) AND (“Clinical Trials“ OR “Randomized Trials” OR “Randomized Controlled Trials” OR “Controlled Clinical Trials”) {No Related Terms} | 110     |

|  |  |                                                                                       |  |
|--|--|---------------------------------------------------------------------------------------|--|
|  |  | limit to (ovid full text available and articles with abstracts and original articles) |  |
|--|--|---------------------------------------------------------------------------------------|--|

ProQuest 6 May 2023

| No. | Key concept                                | Search terms                                                                                                                                                                                                                              | Results |
|-----|--------------------------------------------|-------------------------------------------------------------------------------------------------------------------------------------------------------------------------------------------------------------------------------------------|---------|
| 1.  | Zinc AND<br>Malaria AND<br>Clinical trials | zinc AND (malaria OR plasmodium OR<br>“Plasmodium Infection“ OR “Remittent Fever“ OR<br>“Marsh Fever“ OR Paludism) AND (“Clinical<br>Trials“ OR “Randomized Trials” OR “Randomized<br>Controlled Trials” OR “Controlled Clinical Trials”) | 961     |
